# Supplementary material
Source: PubMed Central journal article supplement (PMC4123402)
Supplement: CJN.10471013_CJN10471013SupplementaryData.pdf [file CJN.10471013_CJN10471013SupplementaryData.pdf]

**Table S1: Patient level information for all patients with PLA2R related disease and follow up data (N=33)**

| PID | Therapy | Baseline anti-PLA2R (u/ml) | PLA2R end of therapy | Protein/creat baseline (g/g) | Protein/creat end of therapy (g/g) | Remission end of therapy | Follow up time (months) | Final outcome          |
|-----|---------|----------------------------|----------------------|------------------------------|------------------------------------|--------------------------|-------------------------|------------------------|
| 1   | MMF     | 141                        | negative             | 9.11                         | 0.28                               | y                        | 60                      | Remission              |
| 2   | MMF     | 144                        | positive             | 7.86                         | 6.19                               | N                        | 60                      | Persistent proteinuria |
| 3   | MMF     | 234                        | negative             | 9.91                         | 1.01                               | Y                        | 60                      | Remission              |
| 4   | MMF     | 16260                      | positive             | 15.13                        | 2.46                               | Y                        | 10                      | Relapse                |
| 5   | MMF     | 62                         | negative             | 11.32                        | 9.20                               | N                        | 24                      | Immunosuppr. therapy   |
| 6   | MMF     | 424                        | positive             | 25.20                        | 6.68                               | N                        | 5                       | Immunosuppr. therapy   |
| 7   | MMF     | 2917                       | positive             | 24.44                        | 9.46                               | N                        | 0                       | Relapse                |
| 8   | MMF     | 431                        | negative             | 19.67                        | 6.60                               | N                        | 55                      | Relapse                |
| 9   | MMF     | 129                        | negative             | 12.29                        | 1.44                               | Y                        | 60                      | Remission              |
| 10  | MMF     | 163                        | negative             | 13.65                        | 0.19                               | Y                        | 44                      | Relapse                |
| 11  | MMF     | 906                        | positive             | 10.47                        | 5.46                               | N                        | 20                      | Dead                   |
| 12  | MMF     | 253                        | negative             | 12.40                        | 0.27                               | Y                        | 60                      | Remission              |
| 13  | MMF     | 190                        | positive             | 12.73                        | 2.37                               | Y                        | 22                      | Dead                   |
| 14  | MMF     | 3000                       | negative             | 12.34                        | 1.99                               | Y                        | 60                      | Remission              |
| 15  | MMF     | 3730                       | positive             | 6.48                         | 0.35                               | Y                        | 3                       | Relapse                |
| 16  | CF      | 590                        | negative             | 7.79                         | 1.13                               | Y                        | 60                      | Remission              |
| 17  | CF      | 203                        | negative             | 4.37                         | 0.19                               | Y                        | 60                      | Remission              |
| 18  | CF      | 455                        | negative             | 11.91                        | 0.89                               | Y                        | 60                      | Remission              |
| 19  | CF      | 333                        | positive             | 10.38                        | 5.22                               | N                        | 5                       | Immunosuppr. therapy   |
| 20  | CF      | 1241                       | negative             | 3.18                         | 1.41                               | Y                        | 60                      | Remission              |
| 21  | CF      | 200                        | negative             | 7.05                         | 0.88                               | Y                        | 60                      | Remission              |
| 22  | CF      | 229                        | negative             | 8.84                         | 0.48                               | Y                        | 60                      | Remission              |
| 23  | CF      | 267                        | negative             | 13.29                        | 2.94                               | Y                        | 23                      | Relapse                |
| 24  | CF      | 167                        | negative             | 4.69                         | 0.19                               | Y                        | 21                      | Relapse                |
| 25  | CF      | 264                        | negative             | 7.75                         | 0.60                               | Y                        | 40                      | Relapse                |
| 26  | CF      | 41                         | negative             | 3.35                         | 1.79                               | Y                        | 49                      | Relapse                |
| 27  | CF      | 1385                       | negative             | 10.49                        | 0.21                               | Y                        | 60                      | Remission              |
| 28  | CF      | 480                        | positive             | 12.82                        | 8.36                               | N                        | 0                       | Relapse                |
| 29  | CF      | 1250                       | negative             | 10.88                        | 0.16                               | Y                        | 34                      | Relapse                |
| 30  | CF      | 2150                       | negative             | 10.29                        | 0.98                               | Y                        | 14                      | Dead                   |
| 31  | CF      | 1430                       | negative             | 8.84                         | 0.75                               | Y                        | 60                      | Remission              |
| 32  | CF      | 1350                       | negative             | 13.05                        | 1.15                               | Y                        | 13                      | Relapse                |
| 33  | CF      | 1580                       | negative             | 15.22                        | 2.67                               | y                        | 60                      | Remission              |

**Table S2:** Outcome per tertile of baseline PLA2R-ab titer in PLA2R related disease (N=33)

|                 | Initial response: remission | Remission* | Relapse* | Persisting proteinuria* | Immunosuppr. therapy | Dead |
|-----------------|-----------------------------|------------|----------|-------------------------|----------------------|------|
| 40-230 (N=11)   | 9                           | 5          | 3        | 1                       | 1                    | 1    |
| 232-1129 (N=11) | 6                           | 4          | 4        | 0                       | 2                    | 1    |
| ≥1130 (N=11)    | 10                          | 5          | 5        | 0                       | 0                    | 1    |

\*Outcome ascertained at final follow-up (5 years).

No significant differences observed.

**Table S3:** outcome in patients with PLA2R-related disease who were PLA2R-ab negative at end of therapy

|                                                       | mycophenolate mofetil (N=8) | cyclophosphamide (N=16) |
|-------------------------------------------------------|-----------------------------|-------------------------|
| Persistent remission                                  | 5                           | 9                       |
| Relapse / persistent proteinuria/immunosuppr. therapy | 3                           | 6                       |
| Dead                                                  | 0                           | 1                       |

No significant difference observed.
